# Supplementary material for: Magnetic leathers
Source: Royal Society of Chemistry journal article supplement (doi:10.1039/c5ra21909d), 2016-01-01
Supplement: c5ra21909d2.pdf [file c5ra21909d2.pdf]

## Supporting Information

### Magnetic leathers†

P. Thanikaivelan\*, R. Murali and K. Krishnaraj

*Advanced Materials Laboratory, Centre for Leather Apparel & Accessories  
Development, Central Leather Research Institute (Council of Scientific and Industrial  
Research), Adyar, Chennai 600020, India*

*E-mail: thanik8@yahoo.com; thanik@clri.res.in;*

**Fig. S1** Digital images showing the incorporation of (a) IONP and (b) CMP particles with the bottom coat solution.

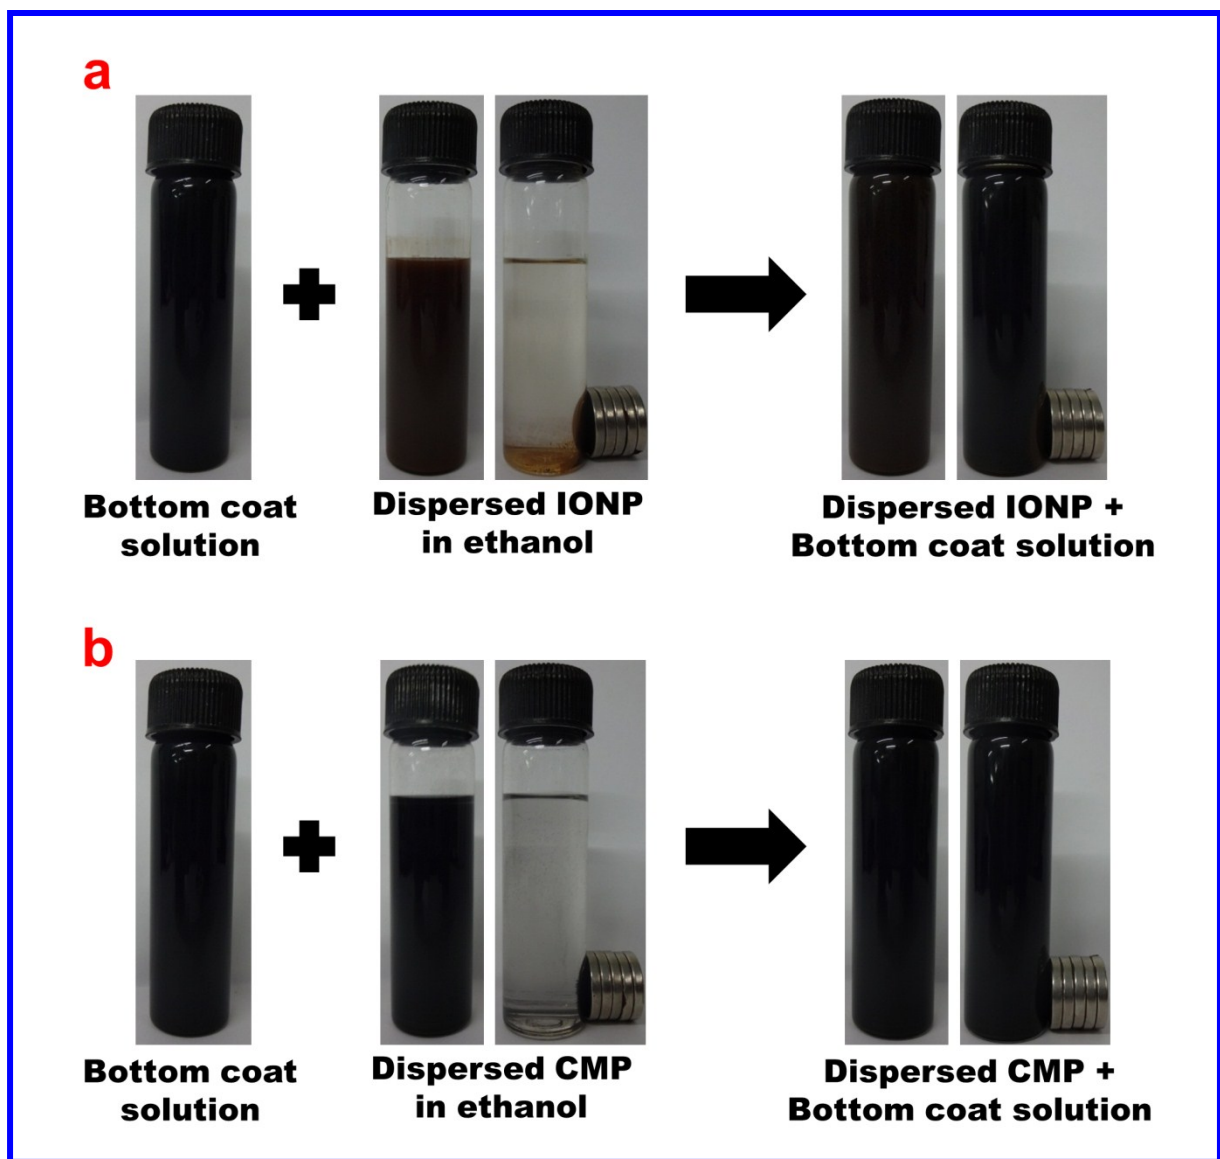

**Fig. S2** HRSEM image showing the surface morphology of as-synthesized iron oxide nanoparticles with particle size.

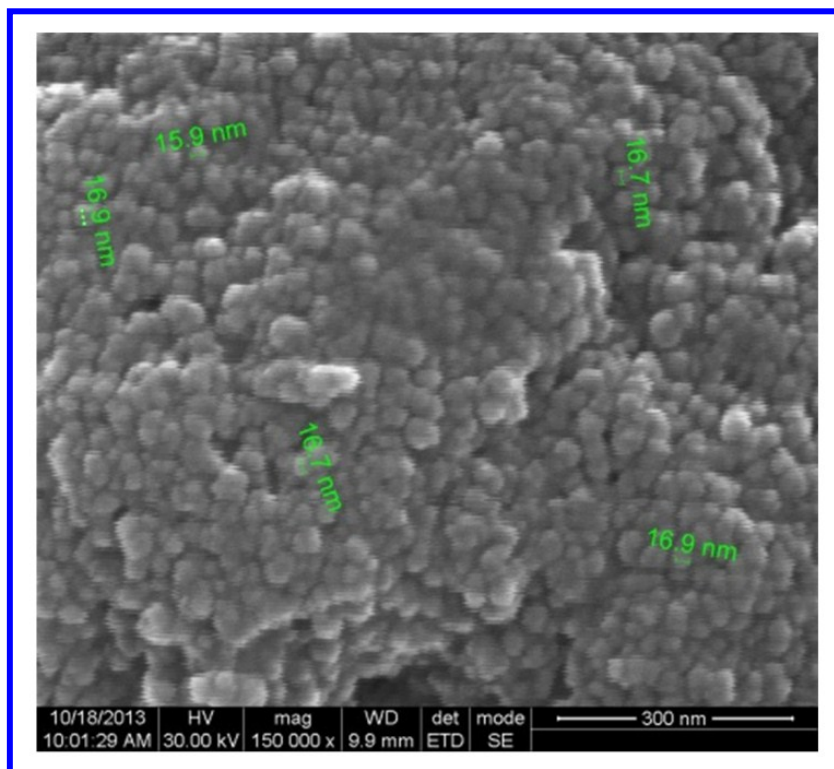

**Fig. S3** Coercivity of as-synthesized  $\text{Fe}_3\text{O}_4$  nanoparticles in magnified M-H curve probed using a vibrating sample magnetometer.

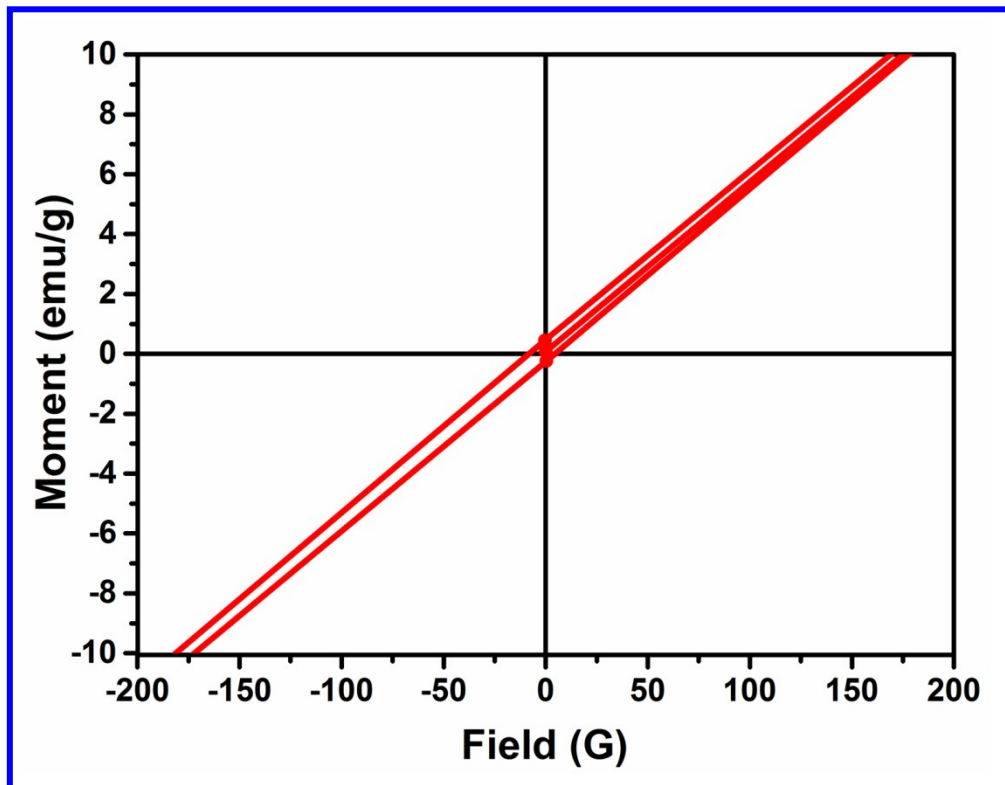

**Fig. S4** XRD pattern of control cow crust leather after surface coating without any IONP or CMP particles.

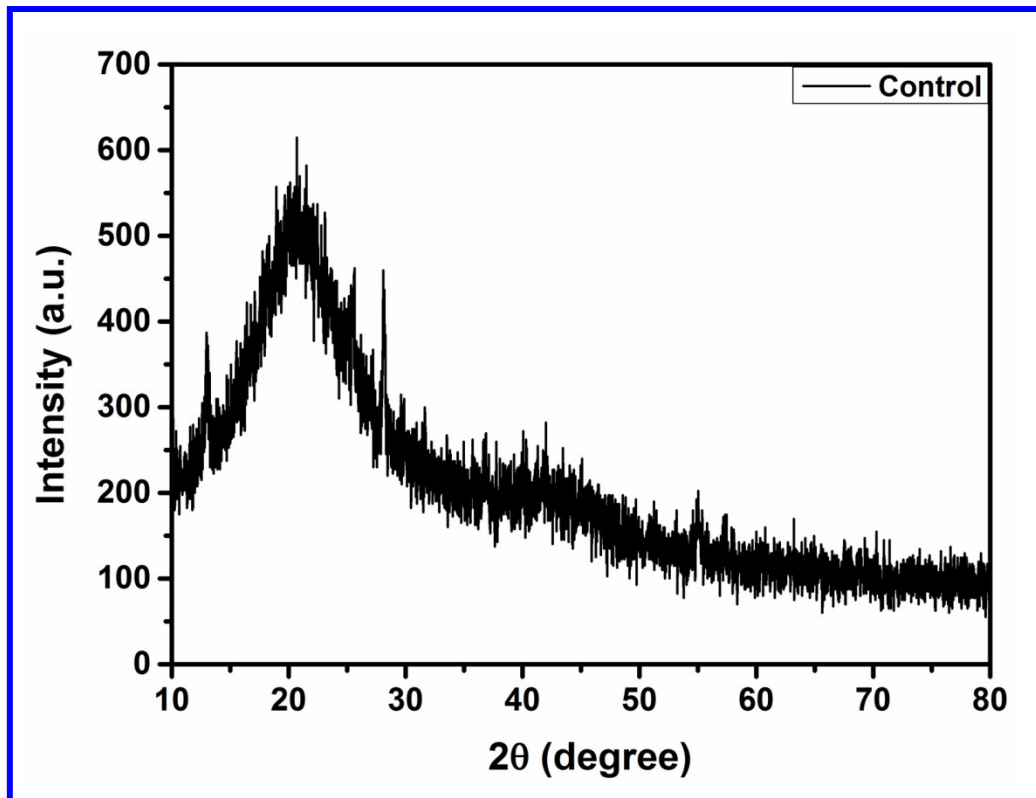

**Fig. S5** HRSEM images showing the surface of (a) IONP and (b) CMP coated leathers at higher magnification.

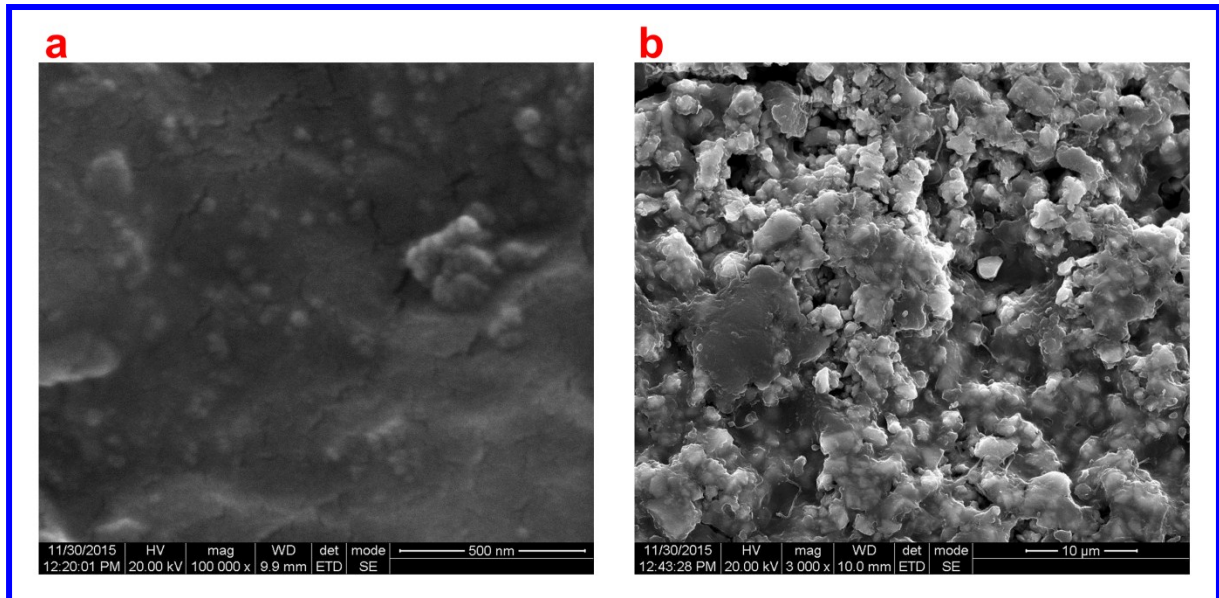

**Table S1** Magnetic properties of commercial magnetic pigment

| Properties                              | CMP  |
|-----------------------------------------|------|
| Coercivity, G                           | 226  |
| Specific Remanent Magnetisation, emu/g  | 32   |
| Spec. Max. Magnetisation, emu/g         | 83   |
| Relative Remanence, $\sigma_r/\sigma_m$ | 0.38 |

**Table S2** Technical details of commercial leather finishing (surface coating) chemicals used in this study (procured from M/s Stahl India Pvt. Ltd., Chennai)

| Technical data | Protein binder<br>(BI – 1352)                                                     | Resin binder<br>(RA – 2312)                                                       | PU<br>(WT – 2564)                                                                  | Feel modifier<br>(HM – 145)                                                         | Wax filler<br>(FI – 50)                                                             | Black pigment<br>(PP – 18-032)                                                      | Nitrocellulose<br>lacquer<br>(LW – 65-000)                                          |
|----------------|-----------------------------------------------------------------------------------|-----------------------------------------------------------------------------------|------------------------------------------------------------------------------------|-------------------------------------------------------------------------------------|-------------------------------------------------------------------------------------|-------------------------------------------------------------------------------------|-------------------------------------------------------------------------------------|
| Image          |  |  |  |  |  |  |  |
| Description    | Modified protein dispersion                                                       | Self-crosslinkable acrylic co-polymer emulsion                                    | High gloss aliphatic polyurethane dispersion                                       | Solvent-borne silicone solution                                                     | Aqueous wax emulsion                                                                | Jet black, pigment dispersion in a protein binder system                            | Clear high solids NC lacquer emulsion – DOP/DBP Free                                |
| Appearance     | Beige/opaque/liquid                                                               | White/slightly opaque/liquid                                                      | Beige grey/semi transparent/liquid                                                 | Grey white/transparent/liquid                                                       | Beige/slightly opaque/liquid                                                        | Jet black/opaque/liquid                                                             | Milky white                                                                         |
| Solids (%)     | ~ 21                                                                              | ~ 35                                                                              | ~ 33                                                                               | ~ 10                                                                                | ~ 7.5                                                                               | ~ 26                                                                                | ~ 12.5                                                                              |



|                                                |             |             |             |             |             |              |            |
|------------------------------------------------|-------------|-------------|-------------|-------------|-------------|--------------|------------|
| <b>Viscosity<br/>(m.Pa.s, 20°C)</b>            | 4000        | < 25        | 100         | < 15        | 200         | 300          | 600 - 1200 |
| <b>pH</b>                                      | 8.5         | 7.8         | 8.8         | -           | 9.5         | 9.5          | -          |
| <b>Specific gravity<br/>(kg/m<sup>3</sup>)</b> | 1030        | 1000        | 1050        | 900         | 1000        | 1020         | 930 - 950  |
| <b>(Film) Hardness</b>                         | Medium hard | Medium soft | Hard        | Medium hard | Medium soft | -            | -          |
| <b>Gross ratio</b>                             | -           | -           | Very bright | -           | -           | -            | -          |
| <b>Flash point (°C)</b>                        | -           | -           | -           | 32          | -           | -            | -          |
| <b>Pigment type</b>                            | -           | -           | -           | -           | -           | Carbon black | -          |
| <b>Gloss (%)</b>                               | -           | -           | -           | -           | -           | -            | >70        |

**Table S3** Flexing resistance of control leather samples cut along and across the backbone direction at dry and wet conditions

| No. of cycles | Control     |              |             |              |
|---------------|-------------|--------------|-------------|--------------|
|               | Along - dry | Across - dry | Along - wet | Across - wet |
| 10,000        | A           | A            | C           | C            |
| 20,000        | A           | A            |             |              |
| 30,000        | A           | A            |             |              |
| 40,000        | A           | A            |             |              |
| 50,000        | A           | A            |             |              |
| 60,000        | A           | A            |             |              |
| 70,000        | A           | A            |             |              |
| 80,000        | A           | A            |             |              |
| 90,000        | A           | B            |             |              |
| 1,00,000      | B           | B            |             |              |

A: no effect; B: slight creasing; C: slight pipiness

**Table S4** Flexing resistance of IONP coated leather samples cut along and across the backbone direction at dry and wet conditions

| No. of cycles | IONP        |              |             |              |
|---------------|-------------|--------------|-------------|--------------|
|               | Along - dry | Across - dry | Along - wet | Across - wet |
| 10,000        | A           | A            | B           | B            |
| 20,000        | A           | A            |             |              |
| 30,000        | A           | A            |             |              |
| 40,000        | A           | A            |             |              |
| 50,000        | A           | A            |             |              |
| 60,000        | A           | A            |             |              |
| 70,000        | A           | A            |             |              |
| 80,000        | A           | A            |             |              |
| 90,000        | A           | A            |             |              |
| 1,00,000      | B           | B            |             |              |

A: no effect; B: slight creasing; C: slight pipiness

**Table S5** Flexing resistance of CMP coated leather samples cut along and across the backbone direction at dry and wet conditions

| No. of cycles | CMP         |              |             |              |
|---------------|-------------|--------------|-------------|--------------|
|               | Along - dry | Across - dry | Along - wet | Across - wet |
| 10,000        | A           | A            | B           | B            |
| 20,000        | A           | A            |             |              |
| 30,000        | A           | A            |             |              |
| 40,000        | A           | A            |             |              |
| 50,000        | A           | A            |             |              |
| 60,000        | A           | A            |             |              |
| 70,000        | A           | A            |             |              |
| 80,000        | A           | A            |             |              |
| 90,000        | A           | A            |             |              |
| 1,00,000      | A           | A            |             |              |

A: no effect; B: slight creasing; C: slight pipiness

## List of Supporting Movies

**Movie S1** Video showing the response of control and magnetic leathers (treated with IONP and CMP particles) under magnetic field generated using permanent magnets (~1500 Oe).

**Movie S2** Video showing the response of control and magnetic leathers (treated with IONP and CMP particles) under magnetic field generated using an electromagnet fabricated using an iron screw and insulated copper wire.
